# Supplementary material for: Effects of Olfactory Mucosa Stem/Stromal Cell and Olfactory Ensheating Cells Secretome on Peripheral Nerve Regeneration
Source: MDPI journal article supplement (doi:10.3390/biom12060818), 2022-06-11
Supplement: s1 [file s1]

## Supplementary Material

**Table S1:** Mean normalized concentration of each biomarker in the CM of OM-MSCs (mean  $\pm$  SD). *nd* = non-defined.

| Biomarker   | Mean normalized concentration |        |        |        | Biomarker | Mean normalized concentration |        |        |        | Biomarker | Mean normalized concentration |        |        |        |      |      |      |
|-------------|-------------------------------|--------|--------|--------|-----------|-------------------------------|--------|--------|--------|-----------|-------------------------------|--------|--------|--------|------|------|------|
|             | P4 24h                        | P4 48h | P7 24h | P7 48h |           | P4 24h                        | P4 48h | P7 24h | P7 48h |           | P4 24h                        | P4 48h | P7 24h | P7 48h |      |      |      |
| EGF         | Mean                          | nd     | nd     | nd     | IL-2      | Mean                          | nd     | nd     | nd     | nd        | IP-10                         | Mean   | nd     | 0.12   | 0.28 | 0.43 |      |
|             | SD                            | nd     | nd     | nd     |           | nd                            | SD     | nd     | nd     | nd        |                               | nd     | SD     | nd     | 0.01 | 0.00 | 0.04 |
| Eotaxin     | Mean                          | nd     | nd     | nd     | IL-4      | Mean                          | nd     | nd     | nd     | nd        | Leptin                        | Mean   | nd     | nd     | nd   | nd   |      |
|             | SD                            | nd     | nd     | nd     |           | nd                            | SD     | nd     | nd     | nd        |                               | nd     | SD     | nd     | nd   | nd   | nd   |
| Fractalkine | Mean                          | nd     | nd     | 0.040  | 0.040     | IL-5                          | Mean   | nd     | nd     | nd        | nd                            | LIX    | Mean   | nd     | nd   | 0.02 | 0.06 |
|             | SD                            | nd     | nd     | 0.00   | 0.00      |                               | SD     | nd     | nd     | nd        | nd                            |        | SD     | nd     | nd   | 0.00 | 0.00 |
| G-CSF       | Mean                          | nd     | nd     | nd     | nd        | IL-6                          | Mean   | nd     | nd     | nd        | nd                            | MCP-1  | Mean   | nd     | nd   | 0.05 | 0.11 |
|             | SD                            | nd     | nd     | nd     | nd        |                               | SD     | nd     | nd     | nd        | nd                            |        | SD     | nd     | nd   | 0.00 | 0.00 |
| GM-CSF      | Mean                          | nd     | nd     | nd     | nd        | IL-10                         | Mean   | nd     | 0.01   | 0.04      | 0.02                          | MIP-1α | Mean   | nd     | nd   | nd   | nd   |
|             | SD                            | nd     | nd     | nd     | nd        |                               | SD     | nd     | 0.01   | 0.01      | 0.00                          |        | SD     | nd     | nd   | nd   | nd   |
| GRO/KC      | Mean                          | nd     | nd     | 0.08   | 0.19      | IL-12p70                      | Mean   | nd     | nd     | nd        | nd                            | MIP-2  | Mean   | nd     | nd   | nd   | nd   |
|             | SD                            | nd     | nd     | 0.00   | 0.00      |                               | SD     | nd     | nd     | nd        | nd                            |        | SD     | nd     | nd   | nd   | nd   |
| IFN-γ       | Mean                          | 0.03   | 0.04   | 0.06   | 0.115     | IL-13                         | Mean   | nd     | nd     | nd        | nd                            | RANTES | Mean   | nd     | 0.01 | nd   | nd   |
|             | SD                            | 0.01   | 0.00   | 0.014  | 0.06      |                               | SD     | nd     | nd     | nd        | nd                            |        | SD     | nd     | 0.00 | nd   | nd   |
| IL-1α       | Mean                          | nd     | nd     | nd     | nd        | IL-17A                        | Mean   | nd     | nd     | nd        | nd                            | TNF-α  | Mean   | nd     | nd   | nd   | nd   |
|             | SD                            | nd     | nd     | nd     | nd        |                               | SD     | nd     | nd     | nd        | nd                            |        | SD     | nd     | nd   | nd   | nd   |
| IL-1β       | Mean                          | nd     | 0.46   | 0.67   | 0.84      | IL-18                         | Mean   | nd     | nd     | nd        | nd                            | VEGF   | Mean   | 0.01   | 0.12 | 0.14 | 0.48 |
|             | SD                            | nd     | 0.01   | 0.23   | 0.23      |                               | SD     | nd     | nd     | nd        | nd                            |        | SD     | 0.014  | 0.02 | 0.03 | 0.09 |

**Table S2:** Mean normalized concentration of each biomarker in the CM of OECs (mean  $\pm$  SD). *nd* = non defined.

| Biomarker   | Mean normalized concentration |        |        |        | Biomarker | Mean normalized concentration |        |        |        | Biomarker | Mean normalized concentration |        |        |        |        |       |       |
|-------------|-------------------------------|--------|--------|--------|-----------|-------------------------------|--------|--------|--------|-----------|-------------------------------|--------|--------|--------|--------|-------|-------|
|             | P4 24h                        | P4 48h | P7 24h | P7 48h |           | P4 24h                        | P4 48h | P7 24h | P7 48h |           | P4 24h                        | P4 48h | P7 24h | P7 48h |        |       |       |
| EGF         | Mean                          | nd     | nd     | 1.00   | 1.00      | IL-2                          | Mean   | nd     | nd     | nd        | nd                            | IP-10  | Mean   | 0.03   | 0.14   | 0.27  | 0.78  |
|             | SD                            | nd     | nd     | 0.05   | 0.00      |                               | SD     | nd     | nd     | nd        | nd                            |        | SD     | 0.04   | 0.04   | 0.09  | 0.20  |
| Eotaxin     | Mean                          | nd     | nd     | nd     | nd        | IL-4                          | Mean   | nd     | nd     | nd        | nd                            | Leptin | Mean   | nd     | nd     | 0.49  | 1.00  |
|             | SD                            | nd     | nd     | nd     | nd        |                               | SD     | nd     | nd     | nd        | nd                            |        | SD     | nd     | nd     | 0.01  | 0.00  |
| Fractalkine | Mean                          | 0.01   | 0.12   | 0.30   | 0.38      | IL-5                          | Mean   | 0.39   | 0.68   | 0.95      | 0.98                          | LIX    | Mean   | 0.04   | 0.45   | 0.61  | 0.99  |
|             | SD                            | 0.01   | 0.00   | 0.01   | 0.02      |                               | SD     | 0.01   | 0.04   | 0.07      | 0.04                          |        | SD     | 0.04   | 0.01   | 0.21  | 0.01  |
| G-CSF       | Mean                          | nd     | nd     | 0.08   | 0.92      | IL-6                          | Mean   | nd     | nd     | nd        | nd                            | MCP-1  | Mean   | 0.002  | 0.02   | 0.02  | 0.05  |
|             | SD                            | nd     | nd     | 0.00   | 0.11      |                               | SD     | nd     | nd     | nd        | nd                            |        | SD     | 0.003  | 3,000  | 0.002 | 0.004 |
| GM-CSF      | Mean                          | nd     | nd     | nd     | nd        | IL-10                         | Mean   | nd     | 0.15   | 0.08      | 1.00                          | MIP-1α | Mean   | nd     | nd     | 0.05  | 0.98  |
|             | SD                            | nd     | nd     | nd     | nd        |                               | SD     | nd     | 0.17   | 0.01      | 0.00                          |        | SD     | nd     | nd     | 0.00  | 0.00  |
| GRO/KC      | Mean                          | 0.03   | 0.24   | 0.27   | 0.92      | IL-12p70                      | Mean   | nd     | nd     | nd        | nd                            | MIP-2  | Mean   | nd     | 0.06   | nd    | 1.00  |
|             | SD                            | 0.05   | 0.05   | 0.05   | 0.11      |                               | SD     | nd     | nd     | nd        | nd                            |        | SD     | nd     | 0.0002 | nd    | 0.004 |
| IFN-γ       | Mean                          | nd     | 0.10   | 0.46   | 0.67      | IL-13                         | Mean   | nd     | nd     | nd        | nd                            | RANTES | Mean   | 0.001  | 0.03   | 0.14  | 0.97  |
|             | SD                            | nd     | 0.15   | 0.36   | 0.47      |                               | SD     | nd     | nd     | nd        | nd                            |        | SD     | 0.002  | 0.002  | 0.003 | 0.04  |
| IL-1α       | Mean                          | Mean   | 0.03   | nd     | 0.96      | IL-17A                        | Mean   | nd     | nd     | 0.04      | 1.00                          | TNF-α  | Mean   | nd     | nd     | nd    | nd    |
|             | SD                            | SD     | 0.04   | nd     | 0.06      |                               | SD     | nd     | nd     | 0.01      | 0.00                          |        | SD     | nd     | nd     | nd    | nd    |
| IL-1β       | Mean                          | 0.13   | 0.21   | 0.72   | 0.99      | IL-18                         | Mean   | nd     | nd     | 0.40      | 0.95                          | VEGF   | Mean   | 0.006  | 0.30   | 0.51  | 0.95  |
|             | SD                            | 0.12   | 0.00   | 0.30   | 0.01      |                               | SD     | nd     | nd     | 0.15      | 0.07                          |        | SD     | 0.009  | 0.05   | 0.09  | 0.01  |

**Table S3:** Statistical differences in the concentration of biomarkers identified in the CM of OM-MSCs. **a)** Frutalkine; **b)** GRO/KC; **c)** IFN- $\gamma$ ; **d)** IL-1 $\beta$ ; **e)** IL-10; **f)** IP-10; **g)** LIX; **h)** MCP-1; **i)** Rantes; **j)** VEGF.

| <b>a) FRUTALKINE</b>              |        |        |        |        |
|-----------------------------------|--------|--------|--------|--------|
|                                   | P4 24h | P4 48h | P7 24h | P7 48h |
| P4 24h                            |        | ns     | *      | *      |
| P4 48h                            |        |        | ns     | ns     |
| P7 24h                            |        |        |        | ns     |
| P7 48h                            |        |        |        |        |
| <b>b) GRO/KC</b>                  |        |        |        |        |
|                                   | P4 24h | P4 48h | P7 24h | P7 48h |
| P4 24h                            |        | ns     | ns     | ns     |
| P4 48h                            |        |        | ns     | ns     |
| P7 24h                            |        |        |        | ns     |
| P7 48h                            |        |        |        |        |
| <b>c) IFN-<math>\gamma</math></b> |        |        |        |        |
|                                   | P4 24h | P4 48h | P7 24h | P7 48h |
| P4 24h                            |        | ns     | ns     | ns     |
| P4 48h                            |        |        | ns     | ns     |
| P7 24h                            |        |        |        | ns     |
| P7 48h                            |        |        |        |        |
| <b>d) IL-1<math>\beta</math></b>  |        |        |        |        |
|                                   | P4 24h | P4 48h | P7 24h | P7 48h |
| P4 24h                            |        | ns     | *      | *      |
| P4 48h                            |        |        | ns     | ns     |
| P7 24h                            |        |        |        | ns     |
| P7 48h                            |        |        |        |        |
| <b>e) IL-10</b>                   |        |        |        |        |
|                                   | P4 24h | P4 48h | P7 24h | P7 48h |
| P4 24h                            |        | ns     | *      | **     |
| P4 48h                            |        |        | ns     | **     |
| P7 24h                            |        |        |        | ns     |
| P7 48h                            |        |        |        |        |

| f)     | IP-10  |        |        |        |
|--------|--------|--------|--------|--------|
|        | P4 24h | P4 48h | P7 24h | P7 48h |
| P4 24h |        | *      | ***    | ***    |
| P4 48h |        |        | **     | ***    |
| P7 24h |        |        |        | **     |
| P7 48h |        |        |        |        |

| g)     | LIX    |        |        |        |
|--------|--------|--------|--------|--------|
|        | P4 24h | P4 48h | P7 24h | P7 48h |
| P4 24h |        | ns     | ns     | ns     |
| P4 48h |        |        | ns     | ns     |
| P7 24h |        |        |        | ns     |
| P7 48h |        |        |        |        |

| h)     | MCP-1  |        |        |        |
|--------|--------|--------|--------|--------|
|        | P4 24h | P4 48h | P7 24h | P7 48h |
| P4 24h |        | *      | ***    | ****   |
| P4 48h |        |        | ***    | ****   |
| P7 24h |        |        |        | ***    |
| P7 48h |        |        |        |        |

| i)     | RANTES |        |        |        |
|--------|--------|--------|--------|--------|
|        | P4 24h | P4 48h | P7 24h | P7 48h |
| P4 24h |        | ns     | ns     | ns     |
| P4 48h |        |        | ns     | ns     |
| P7 24h |        |        |        | ns     |
| P7 48h |        |        |        |        |

| h)     | VEGF   |        |        |        |
|--------|--------|--------|--------|--------|
|        | P4 24h | P4 48h | P7 24h | P7 48h |
| P4 24h |        | ns     | ns     | **     |
| P4 48h |        |        | ns     | **     |
| P7 24h |        |        |        | **     |
| P7 48h |        |        |        |        |

**Table S4:** Statistical differences in the concentration of biomarkers identified in the CM of OECs. **a)** EGF; **b)** Frutalkine; **c)** G-CSF; **d)** GRO/KC; **e)** IFN- $\gamma$ ; **f)** IL-1 $\alpha$ ; **g)** IL-1 $\beta$ ; **h)** IL-5; **i)** IL-10; **j)** IL-17A; **k)** IL-18; **l)** IP-10; **m)** Leptin; **n)** LIX; **o)** MCP-1; **p)** MCP-1 $\alpha$ ; **q)** MIP-2; **r)** Rantes; **s)** VEGF.

| <b>a) EGF</b> |        |        |        |        |
|---------------|--------|--------|--------|--------|
|               | P4 24h | P4 48h | P7 24h | P7 48h |
| P4 24h        |        | ns     | ****   | ****   |
| P4 48h        |        |        | ****   | ****   |
| P7 24h        |        |        |        | ns     |
| P7 48h        |        |        |        |        |

  

| <b>b) FRUTALKINE</b> |        |        |        |        |
|----------------------|--------|--------|--------|--------|
|                      | P4 24h | P4 48h | P7 24h | P7 48h |
| P4 24h               |        | **     | ***    | ****   |
| P4 48h               |        |        | **     | ***    |
| P7 24h               |        |        |        | *      |
| P7 48h               |        |        |        |        |

  

| <b>c) G-CSF</b> |        |        |        |        |
|-----------------|--------|--------|--------|--------|
|                 | P4 24h | P4 48h | P7 24h | P7 48h |
| P4 24h          |        | ns     | ns     | ***    |
| P4 48h          |        |        | ns     | ***    |
| P7 24h          |        |        |        | ***    |
| P7 48h          |        |        |        |        |

  

| <b>d) GRO/KC</b> |        |        |        |        |
|------------------|--------|--------|--------|--------|
|                  | P4 24h | P4 48h | P7 24h | P7 48h |
| P4 24h           |        | ns     | ns     | ***    |
| P4 48h           |        |        | ns     | **     |
| P7 24h           |        |        |        | **     |
| P7 48h           |        |        |        |        |

  

| <b>e) IFN-<math>\gamma</math></b> |        |        |        |        |
|-----------------------------------|--------|--------|--------|--------|
|                                   | P4 24h | P4 48h | P7 24h | P7 48h |
| P4 24h                            |        | ns     | ns     | ns     |
| P4 48h                            |        |        | ns     | ns     |
| P7 24h                            |        |        |        | ns     |
| P7 48h                            |        |        |        |        |

| f)     |  | IL-1 $\alpha$ |        |        |        |
|--------|--|---------------|--------|--------|--------|
|        |  | P4 24h        | P4 48h | P7 24h | P7 48h |
| P4 24h |  |               | ns     | ns     | ***    |
| P4 48h |  |               |        | ns     | ***    |
| P7 24h |  |               |        |        | ***    |
| P7 48h |  |               |        |        |        |

| g)     |  | IL-1 $\beta$ |        |        |        |
|--------|--|--------------|--------|--------|--------|
|        |  | P4 24h       | P4 48h | P7 24h | P7 48h |
| P4 24h |  |              | ns     | ns     | *      |
| P4 48h |  |              |        | ns     | *      |
| P7 24h |  |              |        |        | ns     |
| P7 48h |  |              |        |        |        |

| h)     |  | IL-5   |        |        |        |
|--------|--|--------|--------|--------|--------|
|        |  | P4 24h | P4 48h | P7 24h | P7 48h |
| P4 24h |  |        | ns     | *      | ***    |
| P4 48h |  |        |        | *      | **     |
| P7 24h |  |        |        |        | ns     |
| P7 48h |  |        |        |        |        |

| i)     |  | IL-10  |        |        |        |
|--------|--|--------|--------|--------|--------|
|        |  | P4 24h | P4 48h | P7 24h | P7 48h |
| P4 24h |  |        | ns     | ns     | ***    |
| P4 48h |  |        |        | ns     | **     |
| P7 24h |  |        |        |        | **     |
| P7 48h |  |        |        |        |        |

| j)     |  | IL-17A |        |        |        |
|--------|--|--------|--------|--------|--------|
|        |  | P4 24h | P4 48h | P7 24h | P7 48h |
| P4 24h |  |        | ns     | **     | ****   |
| P4 48h |  |        |        | **     | ****   |
| P7 24h |  |        |        |        | ****   |
| P7 48h |  |        |        |        |        |

| k)     |  | IL-18  |        |        |        |
|--------|--|--------|--------|--------|--------|
|        |  | P4 24h | P4 48h | P7 24h | P7 48h |
| P4 24h |  |        | ns     | *      | **     |
| P4 48h |  |        |        | *      | **     |
| P7 24h |  |        |        |        | **     |
| P7 48h |  |        |        |        |        |

| l) IP-10 |        |        |        |        |
|----------|--------|--------|--------|--------|
|          | P4 24h | P4 48h | P7 24h | P7 48h |
| P4 24h   |        | ns     | ns     | **     |
| P4 48h   |        |        | ns     | *      |
| P7 24h   |        |        |        | *      |
| P7 48h   |        |        |        |        |

| m) LEPTIN |        |        |        |        |
|-----------|--------|--------|--------|--------|
|           | P4 24h | P4 48h | P7 24h | P7 48h |
| P4 24h    |        | ns     | ****   | ****   |
| P4 48h    |        |        | ****   | ****   |
| P7 24h    |        |        |        | *      |
| P7 48h    |        |        |        |        |

| n) LIX |        |        |        |        |
|--------|--------|--------|--------|--------|
|        | P4 24h | P4 48h | P7 24h | P7 48h |
| P4 24h |        | ns     | *      | **     |
| P4 48h |        |        | ns     | *      |
| P7 24h |        |        |        | ns     |
| P7 48h |        |        |        |        |

| o) MCP-1 |        |        |        |        |
|----------|--------|--------|--------|--------|
|          | P4 24h | P4 48h | P7 24h | P7 48h |
| P4 24h   |        | *      | *      | ***    |
| P4 48h   |        |        | ns     | **     |
| P7 24h   |        |        |        | **     |
| P7 48h   |        |        |        |        |

| p) MCP-1 $\alpha$ |        |        |        |        |
|-------------------|--------|--------|--------|--------|
|                   | P4 24h | P4 48h | P7 24h | P7 48h |
| P4 24h            |        | ns     | ns     | ****   |
| P4 48h            |        |        | ns     | ****   |
| P7 24h            |        |        |        | ****   |
| P7 48h            |        |        |        |        |

| q)     | MIP-2  |        |        |        |
|--------|--------|--------|--------|--------|
|        | P4 24h | P4 48h | P7 24h | P7 48h |
| P4 24h |        | ****   | ns     | ****   |
| P4 48h |        |        | ****   | ****   |
| P7 24h |        |        |        | ****   |
| P7 48h |        |        |        |        |

| r)     | RANTES |        |        |        |
|--------|--------|--------|--------|--------|
|        | P4 24h | P4 48h | P7 24h | P7 48h |
| P4 24h |        | ns     | *      | ****   |
| P4 48h |        |        | *      | ****   |
| P7 24h |        |        |        | ****   |
| P7 48h |        |        |        |        |

| s)     | VEGF   |        |        |        |
|--------|--------|--------|--------|--------|
|        | P4 24h | P4 48h | P7 24h | P7 48h |
| P4 24h |        | **     | **     | ****   |
| P4 48h |        |        | *      | ***    |
| P7 24h |        |        |        | **     |
| P7 48h |        |        |        |        |

**Table S5:** Values of functional deficit (%) obtained performing the EPT test. These tests were performed preoperatively (T0), 1 and 2 weeks after neurotmesis (T1 and T2) and from there every two weeks until week 20 (T20). Results are presented as mean and SD. (*n* = number of animals per group).

| EPT                                |      | Time  |       |       |       |       |       |       |       |       |       |       |       |
|------------------------------------|------|-------|-------|-------|-------|-------|-------|-------|-------|-------|-------|-------|-------|
|                                    |      | T0    | T1    | T2    | T4    | T6    | T8    | T10   | T12   | T14   | T16   | T18   | T20   |
| Group 1: UC<br>( <i>n</i> = 28)    | Mean | 7.20  | 90.00 | 90.00 | 85.60 | 79.20 | 76.60 | 69.20 | 59.00 | 52.40 | 44.00 | 40.60 | 39.20 |
|                                    | SD   | 0.45  | 2.12  | 2.12  | 4.45  | 7.53  | 6.07  | 8.44  | 6.28  | 7.92  | 5.48  | 5.73  | 3.35  |
| Group 2: EtE<br>( <i>n</i> = 5)    | Mean | 6.69  | 74.9  | 70.6  | 68.6  | 65.44 | 60.27 | 59.71 | 49.55 | 48.03 | 45.08 | 38.98 | 28.19 |
|                                    | SD   | 2.51  | 8.57  | 11.40 | 9.92  | 9.78  | 9.64  | 8.70  | 12.17 | 9.37  | 11.47 | 9.86  | 17.05 |
| Group 3: CMOM<br>( <i>n</i> = 6)   | Mean | 6.69  | 74.9  | 70.6  | 68.6  | 65.44 | 60.27 | 59.71 | 49.55 | 48.03 | 45.08 | 38.98 | 28.19 |
|                                    | SD   | 2.51  | 8.57  | 11.4  | 9.92  | 9.78  | 9.64  | 8.70  | 12.17 | 9.37  | 11.47 | 9.86  | 17.05 |
| Group 4: ECMOM<br>( <i>n</i> = 6)  | Mean | 10.29 | 69.67 | 67.77 | 67.9  | 68.54 | 67.29 | 66.31 | 64.45 | 62.17 | 47.23 | 44.31 | 38.49 |
|                                    | SD   | 4.42  | 8.98  | 9.77  | 10.05 | 9.29  | 9.37  | 20.61 | 8.57  | 11.7  | 14.29 | 7.36  | 14.71 |
| Group 5: CMOEC<br>( <i>n</i> = 5)  | Mean | 5.41  | 69.95 | 66.17 | 65.15 | 61.79 | 61.61 | 61.61 | 63.12 | 49.6  | 44.73 | 42.91 | 40.97 |
|                                    | SD   | 7.18  | 12.15 | 8.25  | 3.96  | 11.41 | 11.21 | 11.2  | 8.46  | 9.63  | 8.65  | 7.22  | 7.33  |
| Group 6: ECMOEC<br>( <i>n</i> = 6) | Mean | 1.45  | 75.07 | 73.44 | 71.63 | 65.55 | 63.12 | 62.97 | 58.96 | 51.38 | 50.74 | 46.66 | 42.33 |
|                                    | SD   | 5.44  | 6.65  | 6.47  | 6.00  | 11.43 | 9.99  | 6.23  | 5.31  | 6.80  | 8.26  | 8.58  | 11.13 |

**Table S6:** Statical differences observed in EPT test at 20 weeks. (*ns* = no statistically significant differences).

|        |  | EPT |      |      |       |       |        |
|--------|--|-----|------|------|-------|-------|--------|
|        |  | UC  | EtE  | CMOM | ECMOM | CMOEC | ECMOEC |
| UC     |  |     | **** | **** | ****  | ****  | ****   |
| EtE    |  |     |      | ns   | ns    | ns    | ns     |
| CMOM   |  |     |      |      | ns    | ns    | ns     |
| ECMOM  |  |     |      |      |       | ns    | ns     |
| CMOEC  |  |     |      |      |       |       | ns     |
| ECMOEC |  |     |      |      |       |       |        |

**Table S7:** WRL values in seconds (s) obtained performing WRL test. These tests were performed preoperatively (T0), 1 and 2 weeks after neurotmesis (T1 and T2) and from there every two weeks until week 20 (T20). Results are presented as mean and SD. (*n* = number of animals per group).

| WRL                                |      | Time |       |       |       |       |       |       |      |      |      |      |      |
|------------------------------------|------|------|-------|-------|-------|-------|-------|-------|------|------|------|------|------|
|                                    |      | T0   | T1    | T2    | T4    | T6    | T8    | T10   | T12  | T14  | T16  | T18  | T20  |
| Group 1: UC<br>( <i>n</i> = 28)    | Mean | 2.39 | 2.39  | 2.39  | 2.39  | 2.39  | 2.39  | 2.39  | 2.39 | 2.39 | 2.39 | 2.39 | 2.39 |
|                                    | SD   | 1.17 | 1.17  | 1.17  | 1.17  | 1.17  | 1.17  | 1.17  | 1.17 | 1.17 | 1.17 | 1.17 | 1.17 |
| Group 2: EtE<br>( <i>n</i> = 5)    | Mean | 4.28 | 12.00 | 12.00 | 11.85 | 10.48 | 10.45 | 10.22 | 9.82 | 9.26 | 8.78 | 8.57 | 7.50 |
|                                    | SD   | 0.86 | 0.00  | 0.00  | 0.34  | 2.86  | 2.12  | 2.50  | 2.02 | 3.07 | 2.22 | 0.98 | 0.87 |
| Group 3: CMOM<br>( <i>n</i> = 6)   | Mean | 2.25 | 12.00 | 12.00 | 8.44  | 6.22  | 5.88  | 4.89  | 4.06 | 3.50 | 2.61 | 2.33 | 2.06 |
|                                    | SD   | 0.56 | 0.00  | 0.00  | 2.79  | 1.67  | 0.98  | 3.47  | 1.44 | 1.26 | 0.65 | 0.49 | 0.57 |
| Group 4: ECMOM<br>( <i>n</i> = 6)  | Mean | 1.94 | 12.00 | 12.00 | 8.83  | 7.94  | 7.59  | 5.72  | 3.67 | 3.89 | 2.83 | 2.61 | 2.39 |
|                                    | SD   | 0.86 | 0.00  | 0.00  | 1.52  | 2.02  | 1.62  | 2.47  | 2.22 | 1.63 | 0.41 | 0.53 | 0.83 |
| Group 5: CMOEC<br>( <i>n</i> = 5)  | Mean | 1.99 | 12.00 | 12.00 | 10.2  | 9.13  | 8.73  | 8.73  | 8.67 | 6.87 | 4.47 | 4.27 | 4.07 |
|                                    | SD   | 0.89 | 0.00  | 0.00  | 2.16  | 2.41  | 2.96  | 3.22  | 3.75 | 2.50 | 1.24 | 0.60 | 0.60 |
| Group 6: ECMOEC<br>( <i>n</i> = 6) | Mean | 1.94 | 12.00 | 12.00 | 8.56  | 8.22  | 7.61  | 6.72  | 4.89 | 4.11 | 3.78 | 3.19 | 2.61 |
|                                    | SD   | 0.49 | 0.00  | 0.00  | 1.72  | 1.66  | 2.23  | 3.49  | 1.87 | 2.27 | 1.24 | 1.03 | 1.10 |



**Table S8:** Statical differences observed in EPT test at 20 weeks. (*ns* = no statistically significant differences).

|        |  | WRL |      |      |       |       |        |
|--------|--|-----|------|------|-------|-------|--------|
|        |  | UC  | EtE  | CMOM | ECMOM | CMOEC | ECMOEC |
| UC     |  |     | **** | ns   | ns    | ns    | ns     |
| EtE    |  |     |      | **** | ****  | ****  | ****   |
| CMOM   |  |     |      |      | ns    | ns    | ns     |
| ECMOM  |  |     |      |      |       | ns    | ns     |
| CMOEC  |  |     |      |      |       |       | ns     |
| ECMOEC |  |     |      |      |       |       |        |

**Table S9:** Results of functional recovery through the SFI. These tests were performed preoperatively (T0), 1 and 2 weeks after neurotmesis (T1 and T2) and from there every two weeks until week 20 (T20). Results are presented as mean and SD. (n = number of animals per group).

| SFI                        |      | Time  |        |        |        |        |        |        |        |        |        |        |        |
|----------------------------|------|-------|--------|--------|--------|--------|--------|--------|--------|--------|--------|--------|--------|
|                            |      | T0    | T1     | T2     | T4     | T6     | T8     | T10    | T12    | T14    | T16    | T18    | T20    |
| Group 1: UC<br>(n = 28)    | Mean | -1.45 | -1.45  | -1.45  | -1.45  | -1.45  | -1.45  | -1.45  | -1.45  | -1.45  | -1.45  | -1.45  | -1.45  |
|                            | SD   | 11.12 | 11.12  | 11.12  | 11.12  | 11.12  | 11.12  | 11.12  | 11.12  | 11.12  | 11.12  | 11.12  | 11.12  |
| Group 2: EtE<br>(n = 5)    | Mean | 0.06  | -86.73 | -86.73 | -81.15 | -71.8  | -67.1  | -61.98 | -59.59 | -58.39 | -54.19 | -53.99 | -46.56 |
|                            | SD   | 3.91  | 4.22   | 4.22   | 17.11  | 8.12   | 6.79   | 11.39  | 25.98  | 3.20   | 20.18  | 30.30  | 14.54  |
| Group 3: CMOM<br>(n = 6)   | Mean | 0.76  | -62.41 | -48.52 | -38.48 | -38.04 | -40.31 | -36.98 | -27.94 | -24.54 | -19.89 | -13.9  | -6.49  |
|                            | SD   | 6.83  | 25.33  | 16.04  | 23.44  | 16.74  | 17.23  | 4.80   | 18.13  | 8.68   | 4.54   | 15.31  | 10.56  |
| Group 4: ECMOM<br>(n = 6)  | Mean | -6.93 | -48.57 | -40.42 | -33.09 | -31.61 | -30.43 | -29.97 | -29.47 | -26.05 | -23.64 | -21.31 | -21.24 |
|                            | SD   | 4.92  | 12.26  | 17.26  | 10.88  | 15.79  | 17.51  | 21.52  | 21.74  | 10.74  | 6.54   | 15.54  | 5.57   |
| Group 5: CMOEC<br>(n = 5)  | Mean | 4.2   | -42.88 | -44.45 | -35.29 | -32.95 | -30.96 | -24.21 | -22.46 | -20.71 | -21.39 | -21.29 | -17.17 |
|                            | SD   | 11.23 | 16.8   | 9.06   | 20.84  | 8.60   | 5.26   | 12.15  | 10.54  | 11.07  | 6.58   | 6.66   | 41.37  |
| Group 6: ECMOEC<br>(n = 6) | Mean | 15.02 | -49.48 | -47.54 | -45.35 | -41.3  | -41.18 | -33.15 | -32.98 | -32.15 | -29.48 | -29.00 | -26.82 |
|                            | SD   | 11.62 | 12.65  | 6.21   | 9.97   | 12.58  | 22.71  | 9.49   | 9.71   | 17.19  | 15.7   | 13.07  | 15.17  |

**Table S10:** Statical differences observed in SFI test at 20 weeks. (*ns* = no statistically significant differences).

|        |  | SFI |      |      |       |       |        |
|--------|--|-----|------|------|-------|-------|--------|
|        |  | UC  | EtE  | CMOM | ECMOM | CMOEC | ECMOEC |
| UC     |  |     | **** | ns   | ns    | ns    | **     |
| EtE    |  |     |      | **   | ns    | ns    | ns     |
| CMOM   |  |     |      |      | ns    | ns    | ns     |
| ECMOM  |  |     |      |      |       | ns    | ns     |
| CMOEC  |  |     |      |      |       |       | ns     |
| ECMOEC |  |     |      |      |       |       |        |

**Table S11:** Results of functional recovery through the SSI. These tests were performed preoperatively (T0), 1 and 2 weeks after neurotmesis (T1 and T2) and from there every two weeks until week 20 (T20). Results are presented as mean and SD. (n = number of animals per group).

| SSI                        |      | Time  |        |        |        |        |        |        |        |        |        |        |        |
|----------------------------|------|-------|--------|--------|--------|--------|--------|--------|--------|--------|--------|--------|--------|
|                            |      | T0    | T1     | T2     | T4     | T6     | T8     | T10    | T12    | T14    | T16    | T18    | T20    |
| Group 1: UC<br>(n = 28)    | Mean | 1.98  | 1.98   | 1.98   | 1.98   | 1.98   | 1.98   | 1.98   | 1.98   | 1.98   | 1.98   | 1.98   | 1.98   |
|                            | SD   | 11.87 | 11.87  | 11.87  | 11.87  | 11.87  | 11.87  | 11.87  | 11.87  | 11.87  | 11.87  | 11.87  | 11.87  |
| Group 2: EtE<br>(n = 5)    | Mean | -5.78 | -74.44 | -73.92 | -70.22 | -68.04 | -59.97 | -52.47 | -46.56 | -44.21 | -43.04 | -41.91 | -33.72 |
|                            | SD   | 12.91 | 6.83   | 6.82   | 6.44   | 11.02  | 2.64   | 27.43  | 16.79  | 15.34  | 12.31  | 24.55  | 15.72  |
| Group 3: CMOM<br>(n = 6)   | Mean | 5.68  | -65.49 | -52.95 | -37.73 | -38.15 | -35.32 | -36.49 | -29.53 | -23.29 | -24.7  | -11.17 | -7.87  |
|                            | SD   | 3.17  | 15.14  | 15.93  | 24.04  | 16.57  | 15.63  | 9.89   | 16.09  | 6.28   | 7.27   | 11.12  | 6.54   |
| Group 4: ECMOM<br>(n = 6)  | Mean | 0.06  | -45.64 | -35.61 | -31.43 | -30.75 | -29.44 | -29.25 | -26.45 | -26.4  | -25.95 | -21.89 | -17.82 |
|                            | SD   | 5.78  | 10.35  | 18.25  | 10.51  | 19.64  | 15.56  | 19.53  | 14.75  | 13.5   | 10.35  | 8.72   | 10.11  |
| Group 5: CMOEC<br>(n = 5)  | Mean | 6.89  | -44.24 | -44.63 | -31.72 | -30.63 | -19.89 | -31.51 | -25.3  | -22.59 | -22.22 | -21.62 | -10.14 |
|                            | SD   | 6.46  | 17.57  | 10.61  | 24.55  | 9.24   | 12.57  | 10.01  | 14.3   | 12.67  | 8.43   | 8.38   | 41.08  |
| Group 6: ECMOEC<br>(n = 6) | Mean | 0.06  | -45.64 | -35.61 | -31.43 | -30.75 | -29.44 | -29.25 | -26.45 | -26.4  | -25.95 | -21.89 | -17.82 |
|                            | SD   | 5.78  | 10.35  | 18.25  | 10.51  | 19.64  | 15.56  | 19.53  | 14.75  | 13.5   | 10.35  | 8.72   | 10.11  |

**Table S12:** Statical differences observed in SSI test at 20 weeks. (ns = no statistically significant differences).

|        |  | SSI |     |      |       |       |        |
|--------|--|-----|-----|------|-------|-------|--------|
|        |  | UC  | EtE | CMOM | ECMOM | CMOEC | ECMOEC |
| UC     |  |     | *** | ns   | ns    | ns    | **     |
| EtE    |  |     |     | ns   | ns    | ns    | ns     |
| CMOM   |  |     |     |      | ns    | ns    | ns     |
| ECMOM  |  |     |     |      |       | ns    | ns     |
| CMOEC  |  |     |     |      |       |       | ns     |
| ECMOEC |  |     |     |      |       |       |        |

**Table S13:** Stereological quantitative assessment. The different parameters considered were evaluated in the regenerated sciatic nerve at week 20 (T20) after neurotmesis. Results are presented as mean and SD ( $n$  = number of animals per group).

| Stereological Quantitative Assessment |      | Density | Total number | Axon diameter (d) | Fiber diameter (D) | Myelin thickness (M) | M/d  | D/d  | d/D (g-ratio) | Cross-sectional area (mm <sup>2</sup> ) |
|---------------------------------------|------|---------|--------------|-------------------|--------------------|----------------------|------|------|---------------|-----------------------------------------|
| Group 1: UC ( $n$ = 4)                | Mean | 10167   | 10200        | 5.00              | 8.28               | 1.64                 | 0.35 | 1.71 | 0.60          | 1.005                                   |
|                                       | SD   | 490.1   | 1355         | 0.39              | 0.40               | 0.05                 | 0.03 | 0.07 | 0.02          | 0.1258                                  |
| Group 2: EtE ( $n$ = 5)               | Mean | 30072   | 17423        | 2.37              | 3.77               | 0.70                 | 0.35 | 1.70 | 0.60          | 0.6100                                  |
|                                       | SD   | 5443    | 2217         | 0.13              | 0.21               | 0.05                 | 0.02 | 0.03 | 0.01          | 0.2115                                  |
| Group 3: CMOM ( $n$ = 6)              | Mean | 20153   | 12572        | 3.01              | 4.42               | 0.71                 | 0.24 | 0.68 | 0.66          | 0.6258                                  |
|                                       | SD   | 3609    | 2324         | 0.33              | 0.42               | 0.05                 | 0.14 | 0.79 | 0.01          | 0.0604                                  |
| Group 4: ECMOM ( $n$ = 4)             | Mean | 21631   | 11462        | 2.84              | 4.4                | 0.78                 | 0.28 | 0.64 | 0.65          | 0.5339                                  |
|                                       | SD   | 1395    | 3486         | 0.29              | 0.63               | 0.26                 | 0.9  | 0.45 | 0.05          | 0.1727                                  |
| Group 5: CMOEC ( $n$ = 5)             | Mean | 27884   | 10851        | 2.73              | 3.9                | 0.58                 | 0.21 | 0.7  | 0.68          | 0.3889                                  |
|                                       | SD   | 429     | 1962         | 0.72              | 0.74               | 0.09                 | 0.12 | 0.98 | 0.06          | 0.0678                                  |
| Group 6: ECMOEC ( $n$ = 4)            | Mean | 22010   | 11131        | 2.95              | 4.28               | 0.67                 | 0.23 | 0.69 | 0.67          | 0.5033                                  |
|                                       | SD   | 3517    | 2573         | 0.27              | 0.39               | 0.12                 | 0.44 | 0.69 | 0.04          | 0.0567                                  |

**Table S14:** Statistical differences in the nerve stereological analysis: **a)** Density of fibers; **b)** Total number of fibers; **c)** Axon diameter; **d)** Fiber diameter; **e)** Myelin thickness; **f)** g-ratio; **g)** Cross sectional area. ( $ns$  = no statistically significant differences).

**a) Density**

|        | UC | EtE  | CMOM | ECMOM | CMOEC | ECMOEC |
|--------|----|------|------|-------|-------|--------|
| UC     |    | **** | **   | ***   | ****  | ***    |
| EtE    |    |      | ***  | **    | ns    | *      |
| CMOM   |    |      |      | ns    | *     | ns     |
| ECMOM  |    |      |      |       | ns    | ns     |
| CMOEC  |    |      |      |       |       | ns     |
| ECMOEC |    |      |      |       |       |        |

**b) Total number**

|        | UC | EtE | CMOM | ECMOM | CMOEC | ECMOEC |
|--------|----|-----|------|-------|-------|--------|
| UC     |    | *   | ns   | ns    | ns    | ns     |
| EtE    |    |     | ns   | ns    | ***   | ns     |
| CMOM   |    |     |      | ns    | ns    | ns     |
| ECMOM  |    |     |      |       | ns    | ns     |
| CMOEC  |    |     |      |       |       | ns     |
| ECMOEC |    |     |      |       |       |        |

c) Axon diameter (d)

|        | UC | EtE  | CMOM | ECMOM | CMOEC | ECMOEC |
|--------|----|------|------|-------|-------|--------|
| UC     |    | **** | **** | ****  | ****  | ****   |
| EtE    |    |      | ns   | ns    | ns    | ns     |
| CMOM   |    |      |      | ns    | ns    | ns     |
| ECMOM  |    |      |      |       | ns    | ns     |
| CMOEC  |    |      |      |       |       | ns     |
| ECMOEC |    |      |      |       |       |        |

d) Fiber diameter (D)

|        | UC | EtE  | CMOM | ECMOM | CMOEC | ECMOEC |
|--------|----|------|------|-------|-------|--------|
| UC     |    | **** | **** | ****  | ****  | ****   |
| EtE    |    |      | ns   | ns    | ns    | ns     |
| CMOM   |    |      |      | ns    | ns    | ns     |
| ECMOM  |    |      |      |       | ns    | ns     |
| CMOEC  |    |      |      |       |       | ns     |
| ECMOEC |    |      |      |       |       |        |

e) Myelin thickness (M)

|        | UC | EtE  | CMOM | ECMOM | CMOEC | ECMOEC |
|--------|----|------|------|-------|-------|--------|
| UC     |    | **** | **** | ****  | ****  | ****   |
| EtE    |    |      | ns   | ns    | ns    | ns     |
| CMOM   |    |      |      | ns    | ns    | ns     |
| ECMOM  |    |      |      |       | ns    | ns     |
| CMOEC  |    |      |      |       |       | ns     |
| ECMOEC |    |      |      |       |       |        |

f) d/D (g-ratio)

|        | UC | EtE | CMOM | ECMOM | CMOEC | ECMOEC |
|--------|----|-----|------|-------|-------|--------|
| UC     |    | ns  | ns   | ns    | **    | *      |
| EtE    |    |     | ns   | ns    | **    | *      |
| CMOM   |    |     |      | ns    | ns    | ns     |
| ECMOM  |    |     |      |       | ns    | ns     |
| CMOEC  |    |     |      |       |       | ns     |
| ECMOEC |    |     |      |       |       |        |

g) Cross-sectional area (mm<sup>2</sup>)

|        | UC | EtE | CMOM | ECMOM | CMOEC | ECMOEC |
|--------|----|-----|------|-------|-------|--------|
| UC     |    | **  | **   | **    | ***   | ***    |
| EtE    |    |     | ns   | ns    | ns    | ns     |
| CMOM   |    |     |      | ns    | ns    | ns     |
| ECMOM  |    |     |      |       | ns    | ns     |
| CMOEC  |    |     |      |       |       | ns     |
| ECMOEC |    |     |      |       |       |        |

**Table S15:** Muscle Mass Lost in the cranial tibial muscles of the different therapeutic groups compared to healthy contralateral muscles. Healthy Control and Lesion values are expressed in grams (g).

| Lost of Muscle Mass           |      | Healthy Control | Lesion | Ratio | % of loss |
|-------------------------------|------|-----------------|--------|-------|-----------|
| Group CMOM<br>(n = 6)         | Mean | 1.14            | 0.80   | 70.86 | 29.14     |
|                               | SD   | 0.14            | 0.12   | 7.06  |           |
| Group 4:<br>ECMOM<br>(n = 4)  | Mean | 1.15            | 0.67   | 60.42 | 39.58     |
|                               | SD   | 0.14            | 0.35   | 31.84 |           |
| Group 5:<br>CMOEC<br>(n = 5)  | Mean | 1.33            | 0.69   | 53.70 | 46.30     |
|                               | SD   | 0.22            | 0.27   | 14.70 |           |
| Group 6:<br>ECMOEC<br>(n = 4) | Mean | 1.24            | 0.54   | 42.16 | 57.84     |
|                               | SD   | 0.23            | 0.25   | 14.53 |           |

**Table S16:** Statically significant differences in the evaluation of the Tibial Cranial Muscles: **a)** individual fiber area; **b)** minimum Feret's diameter of the muscle fibers (*ns* = no statistically significant differences).

| <b>a)</b> |  | <b>Fibre Area</b> |     |      |       |       |        |
|-----------|--|-------------------|-----|------|-------|-------|--------|
|           |  | UC                | EtE | CMOM | ECMOM | CMOEC | ECMOEC |
| UC        |  |                   | ns  | ns   | ns    | ****  | ****   |
| EtE       |  |                   |     | **** | ****  | ****  | ****   |
| CMOM      |  |                   |     |      | ns    | ****  | ****   |
| ECMOM     |  |                   |     |      |       | ****  | ****   |
| CMOEC     |  |                   |     |      |       |       | **     |
| ECMOEC    |  |                   |     |      |       |       |        |

  

| <b>b)</b> |  | <b>Minimum Feret's Diameter</b> |      |      |       |       |        |
|-----------|--|---------------------------------|------|------|-------|-------|--------|
|           |  | UC                              | EtE  | CMOM | ECMOM | CMOEC | ECMOEC |
| UC        |  |                                 | **** | **** | ****  | ****  | ****   |
| EtE       |  |                                 |      | **** | ****  | ****  | ****   |
| CMOM      |  |                                 |      |      | ****  | ns    | ns     |
| ECMOM     |  |                                 |      |      |       | ****  | **     |
| CMOEC     |  |                                 |      |      |       |       | ns     |
| ECMOEC    |  |                                 |      |      |       |       |        |
